# Supplementary material for: Neutralizing antibodies to Omicron after the fourth SARS-CoV-2 mRNA vaccine dose in immunocompromised patients highlight the need of additional boosters
Source: bioRxiv or medRxiv preprint supplement (doi:10.1101/2022.11.19.22282537), 2022-11-19

A

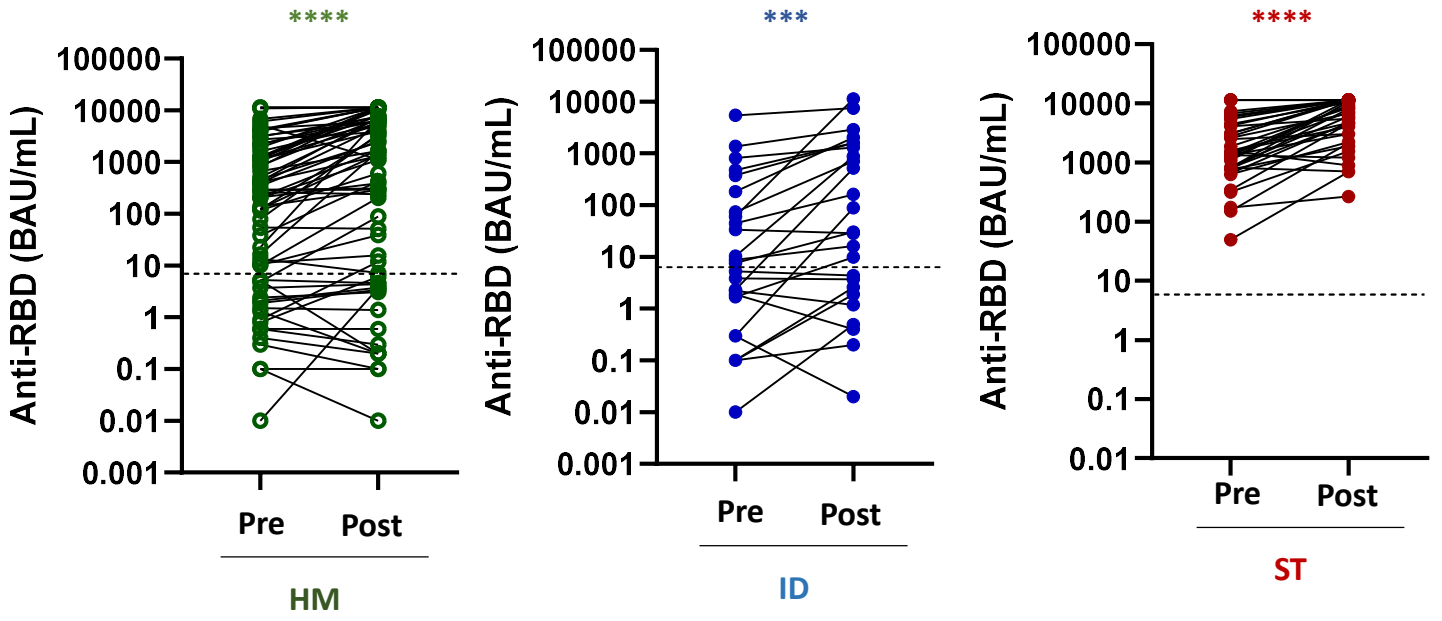

Suppl. Fig. 1

A

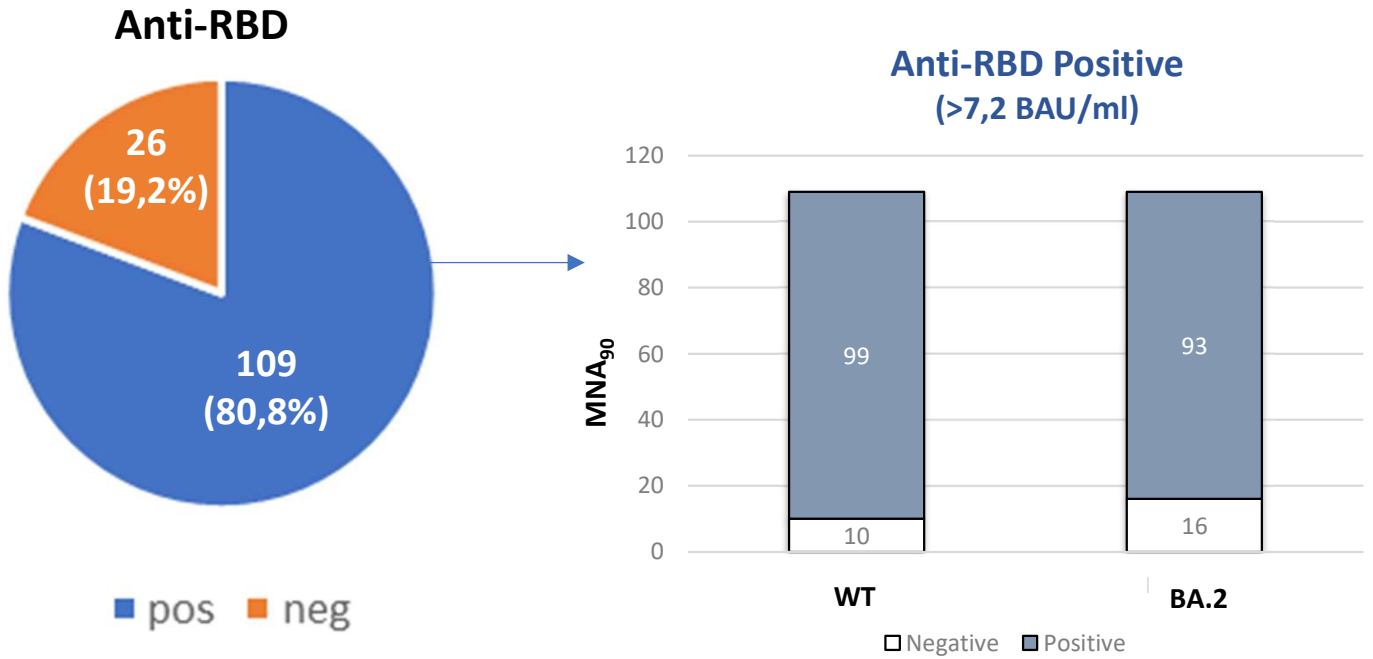

B

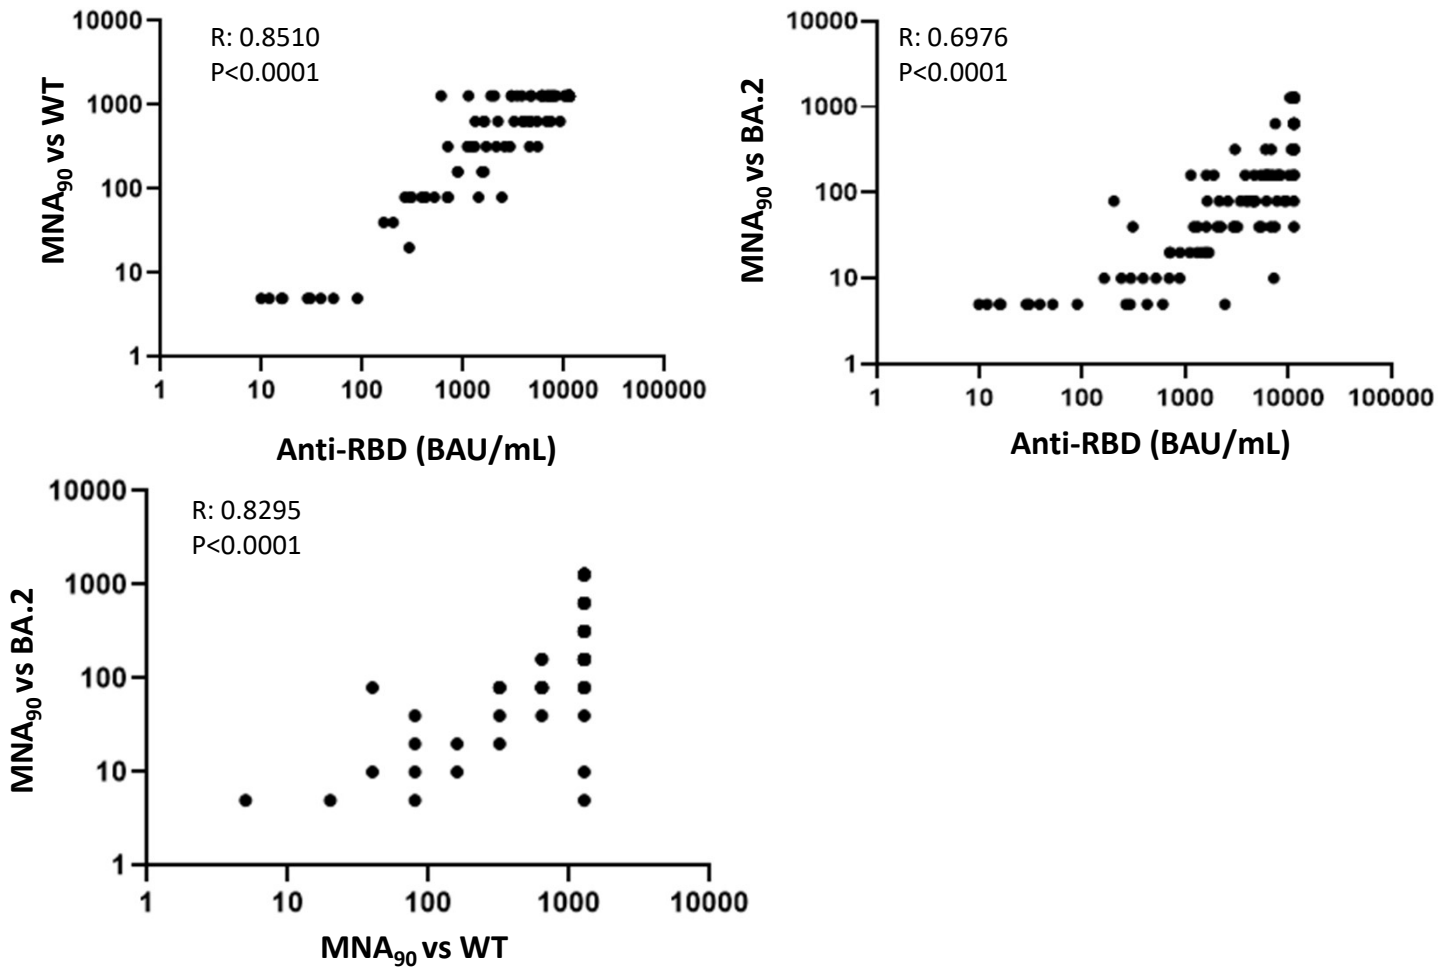

Supplementary Figure 2

A

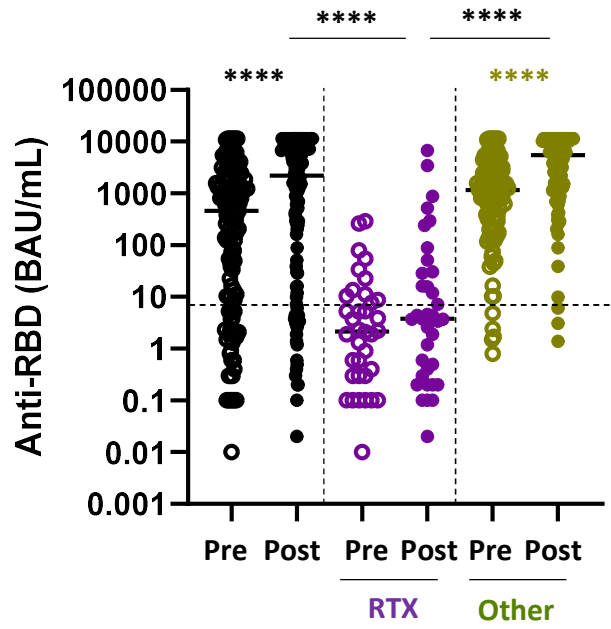

B

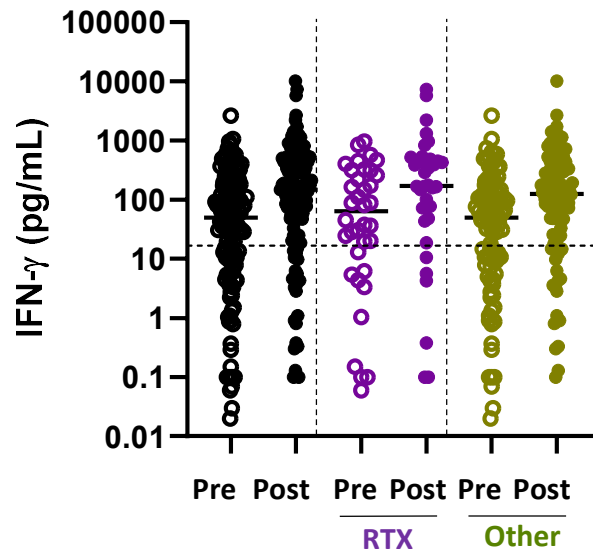

Supplement: Supplementary file [file media-1.pdf]
